# Supplementary material
Source: PubMed Central journal article supplement (PMC6239999)
Supplement: NIHMS967441-supplement-Supp_figS1.pdf [file NIHMS967441-supplement-Supp_figS1.pdf]

Current concepts in the neuropathogenesis of mucopolipidosis type IV  
Lauren C. Boudewyn<sup>1</sup> and Steven U. Walkley<sup>1</sup>

<sup>1</sup>Dominick P. Purpura Dept. of Neuroscience, Rose F. Kennedy Intellectual and Developmental Disabilities Research Center, Albert Einstein College of Medicine, Bronx, NY 10461 USA.

**Corresponding Author:** Steven U. Walkley, [steve.walkley@einstein.yu.edu](mailto:steve.walkley@einstein.yu.edu)

Dominick P. Purpura Dept. of Neuroscience  
Rose F. Kennedy Intellectual and Developmental Disabilities Research Center  
Albert Einstein College of Medicine  
1410 Pelham Parkway South, Room 618  
Bronx, New York 10461

**Supplemental Data**

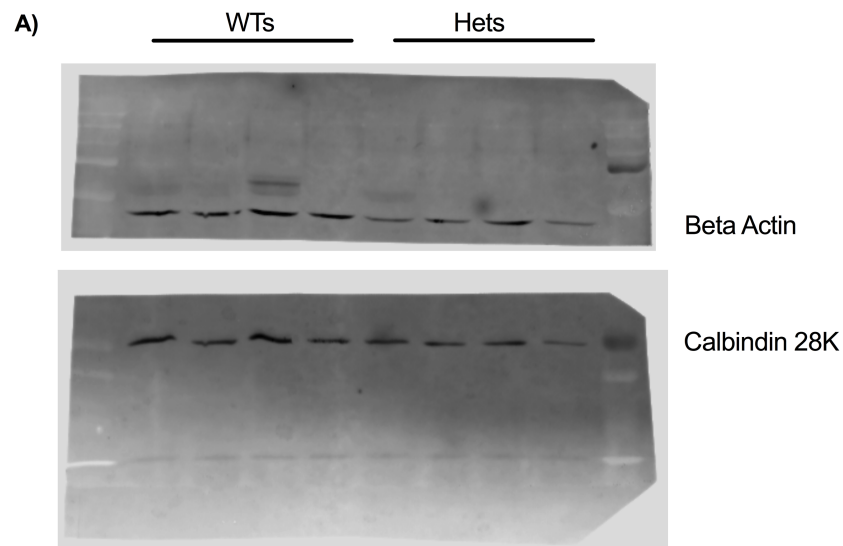

**Supplemental Figure 1:** A) Raw western blot corresponding to Figure 6D. Blot was cut in half to accommodate incubation of actin and calbindin 28K antibodies. Top panel corresponds to blot probed for actin, bottom panel corresponds to blot probed for calbindin 28K.
